# Supplementary material
Source: MDPI journal article supplement (https://www.mdpi.com/2071-1050/10/10/3431)
Supplement: s1 [file s1]

# Supplementary File 1: Original surveys in Spanish and Basque

## A) Survey in Spanish

### Encuesta: PERCEPCIONES SOBRE EL CONSUMO DE AGUA

#### Pág. 1.- Presentación

Mediante este cuestionario revisado se pretende conocer cómo es el consumo de agua en tu comunidad universitaria (alumnado, profesorado y PAS), y las percepciones y las razones que existen detrás de los hábitos de consumo del agua embotellada. Un buen conocimiento de estos hábitos podrían ser un buen punto de partida para promover actitudes más sostenibles y hábitos saludables. Rellena por favor el cuestionario adjunto. Esto no te llevará mas de 5 minutos. Contesta, por favor, a todas las preguntas y una vez finalizado haz click en la pestaña de "Fin". Muchísimas gracias por hacernos llegar tu opinión.

Aclaración: en la encuesta se compara el consumo de agua embotellada con el de agua de grifo. Cuando mencionamos "agua embotellada" nos referimos a botellas de plástico de 330 o 500 ml. Estas botellas se suelen reutilizar. Por otra parte, mencionamos las botellas de cristal y cantimploras, las cuales son rellenadas una y otra vez.

Equipo de investigación:

Joserra Díez (Univ. País Vasco/EHU)  
Arantza Rico (Univ. País Vasco/EHU)  
Iñaki Antigüedad (Univ. País Vasco/EHU)  
Inés Gabari (Univ. Pública de Navarra)  
María Lameiras (Univ. de Vigo)

#### Pág. 2.- Tus datos

Esta encuesta es anónima, si bien nos es necesario recabar algunos datos

##### Preg.1.- Edad

(\* Esta pregunta es obligatoria)  
(\* Marque una sola opción)

- ☐ <20 años
- ☐ 20-30 años
- ☐ 30-50 años
- ☐ >50 años

##### Preg.2.- Colectivo universitario

(\* Esta pregunta es obligatoria)  
(\* Marque una sola opción)

- ☐ Alumnado
- ☐ Profesor-a/Investigadora-a
- ☐ Personal de Administración y Servicios

##### Preg.3.- Universidad, Centro y ubicación

(\* Esta pregunta es obligatoria)

##### Preg.4.- Sexo

(\* Esta pregunta es obligatoria)  
(\* Marque una sola opción)

- ☐ Mujer
- ☐ Hombre

#### Pág. 3.- Nivel de consumo de agua embotellada

##### Preg.5.- A lo largo de la semana, ¿aproximadamente cuántas botellas de agua de un solo uso sueles consumir?

(\* Esta pregunta es obligatoria)  
(\* Marque una sola opción)

- ☐ 0 botella  
☐ 1-2 botellas  
☐ 3-5 botellas  
☐ Más de 6 botellas

**Si en la anterior respuesta has escogido la primera o la segunda opción (0, 1-2 botellas), ¿qué medio empleas para beber agua?**

(\* Esta pregunta es obligatoria)

(\* Marque una sola opción)

(\* Contestar solo si :

**han contestado a "** A lo largo de la semana, ¿aproximadamente cuántas botellas de agua de un solo uso sueles consumir?" : "0 botella" de la página "Nivel de consumo de agua embotellada" o además

**han contestado a "** A lo largo de la semana, ¿aproximadamente cuántas botellas de agua de un solo uso sueles consumir?" : "1-2 botellas" de la página "Nivel de consumo de agua embotellada" .)

- ☐ Reutilizo botellas de plástico  
☐ Reutilizo botellas de vidrio  
☐ Utilizo un vaso o bebo directamente del grifo  
☐ Otro (Por favor especifique)\_\_\_\_\_

## Pág. 4.- El agua embotellada

**Preg.6.- Expresa tu grado de acuerdo a las siguientes afirmaciones.**

(\* Esta pregunta es obligatoria)

|                                                                                          | Totalmente en desacuerdo | Bastante en desacuerdo   | Me es igual              | Bastante de acuerdo      | Totalmente de acuerdo    |
|------------------------------------------------------------------------------------------|--------------------------|--------------------------|--------------------------|--------------------------|--------------------------|
| Es más seguro beber agua embotellada que agua del grifo.                                 | <input type="checkbox"/> |
| Prefiero el sabor del agua embotellada que el del agua de grifo.                         | <input type="checkbox"/> |
| En el campus universitario no hay lugares adecuados para rellenar de nuevo las botellas. | <input type="checkbox"/> |
| La reutilización de las botellas de plástico exige demasiado tiempo y esfuerzo.          | <input type="checkbox"/> |
| Si deshecho una botella de plástico tras un sólo uso me siento culpable.                 | <input type="checkbox"/> |

**Preg.7.- Valora las siguientes afirmaciones de acuerdo a la escala.**

(\* Esta pregunta es obligatoria)

|                                                                                                                                                                          | Totalmente en desacuerdo | En desacuerdo            | Me es igual              | Bastante de acuerdo      | Totalmente de acuerdo    |
|--------------------------------------------------------------------------------------------------------------------------------------------------------------------------|--------------------------|--------------------------|--------------------------|--------------------------|--------------------------|
| Usar botellas de vidrio o cantimploras es más seguro que el consumo de botellas de plástico porque evito determinadas substancias que pueden pasar del plástico al agua. | <input type="checkbox"/> |
| Si yo uso botellas de vidrio o cantimploras empujo a los demás a hacer lo mismo                                                                                          | <input type="checkbox"/> |
| Las botellas de vidrio o cantimploras no son cómodas para ser llevadas de un lugar a otro.                                                                               | <input type="checkbox"/> |

Pág. 5.- El agua de grifo

Preg.8.- Responde a las siguientes afirmaciones de acuerdo a la escala.  
(\* Esta pregunta es obligatoria)

|                                                                                                              | Totalmente en desacuerdo | En desacuerdo            | Me es igual              | Bastante de acuerdo      | Totalmente de acuerdo    |
|--------------------------------------------------------------------------------------------------------------|--------------------------|--------------------------|--------------------------|--------------------------|--------------------------|
| El agua de grifo es más barata que el agua embotellada.                                                      | <input type="checkbox"/> |
| No me fio de la calidad del agua de grifo.                                                                   | <input type="checkbox"/> |
| Si bebo agua del grifo, no tengo que desplazarme hasta la cafetería o la máquina para comprar agua.          | <input type="checkbox"/> |
| Si bebo agua del grifo, colaboro a disminuir el volumen de residuos que van a la basura.                     | <input type="checkbox"/> |
| Si bebo agua del grifo, colaboro a disminuir el consumo de petróleo empleado en la fabricación del plástico. | <input type="checkbox"/> |
| Si bebo agua del grifo, disminuyo mi aportación al cambio climático global.                                  | <input type="checkbox"/> |
| Si bebo agua del grifo, contribuyo a un campus más sostenible.                                               | <input type="checkbox"/> |
| Cuando voy al comedor del campus puedo obtener agua del grifo.                                               | <input type="checkbox"/> |

B) Survey in Basque

# Encuesta: UR KONTSUMOARI BURUZKO PERTZEPZIOAK

## Pág. 1.- Aurkezpena

Galdetegi berriztatu honen bitartez zure unibertsitatearen kolektibo guztien (ikaslego, irakaslego eta AZP) ur kontsumoa eta botilako ura edatearen atzean dauden pertzepzioak eta arrazoiak jakin nahi ditu. Ohitura hauek jakin eta ulertzea abiapuntutzat har liteke osasunago eta jasangarriagoak diren ohiturak bultzatzeko. Bete ezazu mesedez ondoko galdetegia. Ez duzu 5 minutu baino gehiago emango. Ietik 5era doan eskala batean zure desadostasuna/adostasuna adierazi beharko duzu. Galdera guztiak erantzun itzazu eta behin bukatuta egin click "Amaiera" botoian. Mila esker parte hartu eta zure iritzia helarazteagatik.

Azalpena: galdetegi honetan ur enboteilatuaren eta txorrotaren ur kontsumoak konparatzen dira. "Ur enboteilatua" aipatzen denean, 330 edo 500 ml-ko botilei buruz ari gara hitz egiten. Normalean botila hauek berriro erabiltzen dira. Bestalde, beirazko botilak eta kantinplorak aipatzen dira, behin eta berriro bete egiten direnak.

Joserra Díez (Euskal Herriko Unibertsitatea)  
Arantza Rico (Euskal Herriko Unibertsitatea)  
Iñaki Antigüedad (Euskal Herriko Unibertsitatea)  
Inés Gabari (Nafarroako Unibertsitate Publikoa)  
María Lameiras (Vigoko Unibertsitatea)

## Pág. 2.- Zure datuak

Galdetegi hau anonimoa da, baina datu batzuk ezagutzea ezinbestekoa da.

**Preg.1.- Adina**  
(\* Esta pregunta es obligatoria)  
(\* Marque una sola opción)

- <20 urte
- 20-30 urte
- 30-50 urte
- >50 urte

**Preg.2.- Unibertsitate-kolektiboa**  
(\* Esta pregunta es obligatoria)  
(\* Marque una sola opción)

- Ikaslea
- Irakaslea/ikertzailea
- AZP

**Preg.3.- Unibertsitatea, Zentrua eta kokapena.**  
(\* Esta pregunta es obligatoria)

**Preg.4.- Sexua**  
(\* Esta pregunta es obligatoria)  
(\* Marque una sola opción)

- Emakumea
- Gizona

## Pág. 3.- Ur botilatuaren kontsumoaren maila

**Preg.5.- Asteaz zehar, gutxi gorabehera, zenbat erabilera bakarrek plastikozko ur botilak edaten dituzu?**  
(\* Esta pregunta es obligatoria)  
(\* Marque una sola opción)

- 0 botila
- 1-2 botila
- 3-5 botila
- 6 edo gehiago

**Aurreko galderan lehen edo bigarren aukera aukeratu baduzu, zer erabiltzen duzu ura edateko?**  
(\* Marque una sola opción)

(\* Contestar solo si :  
**han contestado a "** Astean zehar, gutxi gorabehera, zenbat erabilera bakarreko plastikozko ur botilak edaten dituzu?" : "0 botila" de la página "Ur botilatuaren kontsumoaren maila" o además  
**han contestado a "** Astean zehar, gutxi gorabehera, zenbat erabilera bakarreko plastikozko ur botilak edaten dituzu?" : "1-2 botila" de la página "Ur botilatuaren kontsumoaren maila" .)

Berrerabili daitekeen ur botila  
Beirazko ur botila  
Edalontzi batez edo txorrotatik zuzen  
Bestelako bat (Zehaztu mesedez)\_\_\_\_\_

Pág. 4.- Ur botilatua

Preg.6.- Ondoko adierazpenei 1etik (batere ados) 5erako (guztiz ados) eskalan erantzuna eman  
(\* Esta pregunta es obligatoria)

|                                                                                        | Guztiz ez-ados | Nahiko ez-ados | Berdin zait | Nahiko ados | Guztiz ados |
|----------------------------------------------------------------------------------------|----------------|----------------|-------------|-------------|-------------|
| Botilako ura edatea txorrotako ura edatea baino seguruagoa da.                         |                |                |             |             |             |
| Unibertsitateko kanpusean ez dago leku egokirik botila uraz berriz betetzeko.          |                |                |             |             |             |
| Botilako uraren zaporea txorrotako urarena baino gehiago gustoko dut.                  |                |                |             |             |             |
| Ur botila behin bakarrik erabili ostean botatzen badut errudun sentitzen naiz.         |                |                |             |             |             |
| Plastikozko ur-botilak birziklatzeak denbora gehiegi edo ahalegin gehiegi eskatzen du. |                |                |             |             |             |

Preg.7.- Ondoko adierazpenei 1etik (guztiz ez-ados) 5era (guztiz ados) doan eskalan erantzuna eman  
(\* Esta pregunta es obligatoria)

|                                                                                                                                                      | Guztiz ez-ados | Nahiko ez-ados | Berdin zait | Nahiko ados | Erabat ados |
|------------------------------------------------------------------------------------------------------------------------------------------------------|----------------|----------------|-------------|-------------|-------------|
| Beirazko ur botila edo kantinplora erabiltzea seguruagoa da plastikozko ur botilak baino, plastikotik datozen produktu toxikoak saihesten ditudalako |                |                |             |             |             |
| Nik beirazko ur botila edo kantinplora erabiltzen badut, besteak gauza bera egitera bultzatzen dut.                                                  |                |                |             |             |             |
| Beirazko ur botilak edo kantinplorak ez dira eroxoak leku batetik bestera eramateko                                                                  |                |                |             |             |             |

Pág. 5.- Txorrotako ura

Preg.8.- Ondoko adierazpenei 1etik (guztiz desados) 5era (guztiz ados) doan eskalan erantzuna eman  
(\* Esta pregunta es obligatoria)

|                                                   | Guztiz ez-ados | Nahiko ez-ados | Berdin zait | Nahiko ados | Guztiz ados |
|---------------------------------------------------|----------------|----------------|-------------|-------------|-------------|
| Botilako ura, txorrotako ura baino garestiagoa da |                |                |             |             |             |
| Ez naiz fio txorrotako uraren kalitateaz.         |                |                |             |             |             |

Txorrotako urak  
erregulazio handiagoa du,  
beraz botilako ura bainoa  
seguruagoa da.

Txorrotako ura edaten  
badut, ez dut dendara joan  
behar ur botila eroatera

Txorrotako ura edaten  
badut, zaborte-gira doan  
plastikoaren kopurua  
gutxitzen laguntzen dut

Txorrotako ura edaten  
badut, plastikoak egiteko  
erabiltzen den  
petrolioaren kontsumoa  
murrizten dut

Txorrotako ura edaten  
badut, aldaketa klimatiko  
globalari ekarpen  
pertsonala murrizten diot.

Txorrotako ura edaten  
badut, unibertsitateko  
campus jasangarriagoa  
egiten laguntzen dut.

Campuseko jantokira  
joaten naizenean  
txorrotako ura eskura  
daukat debalde.
