# Supplementary material
Source: MDPI journal article supplement (https://www.mdpi.com/2071-1050/10/10/3431)
Supplement: s1 [file s1]

## Supplementary File 2:

This document shows the output of the Kruskal-Wallis rank sum test with a Bonferroni correction for differences between groups of bottled water consumption for items in Tables 1, 2 and 3.

When the obtained p value of a Kruskal-Wallis yields significant differences, it indicates that at least one of the groups is different from at least one of the others. For post-hoc analysis, the `kruskalmc` function in the `pgirmess` package was used. This function implements Dunn's *post hoc* rank sum comparison using z test statistics as directed by Siegel and Castellan (1988). This test helps determining which groups are different pairwise with comparisons adjusted appropriately. Those pairs of groups which have observed differences in mean ranks higher than a critical value are considered statistically different at the given probability (p level).

**Table 1**

### Item 6.1\_ It is safer to drink bottled water than tap water

#### Kruskal-Wallis rank sum test

Item 6.1

```
> kruskal.test(Item6.1 ~ FakConsumption2,  
data=ura2013_EHU_en_NAgabe_corr)
```

Kruskal-Wallis rank sum test

data: Item6.1 by FakConsumption2

Kruskal-Wallis chi-squared = 89.3874, df = 3, **p-value < 2.2e-16**

p limit with Bonferroni correction =  $0.05/6$  (4 groups yields six combinations) =  $0.008$  or  $0.01/6 = .0016$

#### Multiple comparisons using kruskalmc in R

```
> kruskalmc(Item6.1 ~ FakConsumption2,  
data=ura2013_EHU_en_NAgabe_corr)  
Multiple comparison test after Kruskal-Wallis  
p.value: 0.05
```

| Comparisons | obs.dif   | critical.dif | difference |
|-------------|-----------|--------------|------------|
| 1-2         | 146.10592 | 64.63178     | TRUE       |
| 1-3         | 266.62728 | 92.24337     | TRUE       |
| 1-4         | 243.09407 | 145.71845    | TRUE       |
| 2-3         | 120.52136 | 96.98944     | TRUE       |
| 2-4         | 96.98815  | 148.76821    | FALSE      |
| 3-4         | 23.53321  | 162.67622    | FALSE      |

Mean Rank in 1 = a  
Mean rank in 2 = b  
Mean Rank in 3 = c  
Mean Rank in 4 =bc

This table shows that there are no differences between groups 3 and 4 and 2 and 4, but there are differences between 1 and 2, 1 and 3, 1 and 4 and 2 and 3

**Item 6.2: "I prefer the taste of bottled water more than that of tap water"**

Kruskal-Wallis rank sum test

```
> kruskal.test(Item6.2 ~ FakConsumption2,  
data=ura2013_EHU_en_NAgabe_corr)
```

Kruskal-Wallis rank sum test

data: Item6.2 by FakConsumption2

Kruskal-Wallis chi-squared = 134.0423, df = 3, **p-value < 2.2e-16**

p limit with Bonferroni correction =  $0.05/6$  (4 groups yields six combinations)= 0.008 or  $0.01/6= .0016$

Multiple comparisons using kruskalmc in R

```
> kruskalmc(Item6.2 ~ FakConsumption2,  
data=ura2013_EHU_en_NAgabe_corr)  
Multiple comparison test after Kruskal-Wallis  
p.value: 0.05
```

| Comparisons | obs.dif   | critical.dif | difference |
|-------------|-----------|--------------|------------|
| 1-2         | 135.74279 | 64.63178     | TRUE       |
| 1-3         | 345.99436 | 92.24337     | TRUE       |
| 1-4         | 330.19075 | 145.71845    | TRUE       |
| 2-3         | 210.25157 | 96.98944     | TRUE       |
| 2-4         | 194.44797 | 148.76821    | TRUE       |
| 3-4         | 15.80361  | 162.67622    | FALSE      |

Mean Rank in 1 = a  
Mean Rank in 2 = b  
Mean Rank in 3 = c  
Mean Rank in 4 = c

**Item 6.3: "At the university campus there are not appropriate facilities to refill the bottles"**

Kruskal-Wallis rank sum test

```
> kruskal.test(Item6.3 ~ FakConsumption2,  
data=ura2013_EHU_en_NAgabe_corr)
```

Kruskal-Wallis rank sum test

data: Item6.3 by FakConsumption2

Kruskal-Wallis chi-squared = 16.2354, df = 3, p-value = 0.001015

p limit with Bonferroni correction =  $0.05/6$  (4 groups yields six combinations) = 0.008 or  $0.01/6 = 0.0016$ ; **0.0010 < 0.0016, significantly different**

Multiple comparisons using kruskalmc in R

```
> kruskalmc(Item6.3 ~ FakConsumption2,  
data=ura2013_EHU_en_NAgabe_corr)  
Multiple comparison test after Kruskal-Wallis  
p.value: 0.05
```

| Comparisons | obs.dif   | critical.dif | difference |
|-------------|-----------|--------------|------------|
| 1-2         | 38.83959  | 64.63178     | FALSE      |
| 1-3         | 113.45223 | 92.24337     | TRUE       |
| 1-4         | 136.94054 | 145.71845    | FALSE      |
| 2-3         | 74.61264  | 96.98944     | FALSE      |
| 2-4         | 98.10095  | 148.76821    | FALSE      |
| 3-4         | 23.48832  | 162.67622    | FALSE      |

Mean rank in 1 = a

Mean rank in 2 = ab

Mean rank in 3 = b

Mean rank in 4 = b

**Item 6.4: "Reusing plastic bottles involves too much time and effort"**

Kruskal-Wallis rank sum test

```
> kruskal.test(Item6.4 ~ FakConsumption2,  
data=ura2013_EHU_en_NAgabe_corr)
```

Kruskal-Wallis rank sum test

data: Item6.4 by FakConsumption2

Kruskal-Wallis chi-squared = 25.8622, df = 3, **p-value = 1.019e-05**

p limit with Bonferroni correction =  $0.05/6$  (4 groups yields six combinations) = 0.008 or  $0.01/6 = 0.0016$

Multiple comparisons using kruskalmc in R

```
> kruskalmc(Item6.4 ~ FakConsumption2,
data=ura2013_EHU_en_NAgabe_corr)
Multiple comparison test after Kruskal-Wallis
p.value: 0.05
```

| Comparisons | obs.dif   | critical.dif | difference |
|-------------|-----------|--------------|------------|
| 1-2         | 69.27711  | 64.63178     | TRUE       |
| 1-3         | 138.84737 | 92.24337     | TRUE       |
| 1-4         | 107.48761 | 145.71845    | FALSE      |
| 2-3         | 69.57027  | 96.98944     | FALSE      |
| 2-4         | 38.21050  | 148.76821    | FALSE      |
| 3-4         | 31.35976  | 162.67622    | FALSE      |

Mean rank in 1 = a  
Mean rank in 2 = ab  
Mean rank in 3 = b  
Mean rank in 4 = ab

**Item 6.5: "I feel guilty if I bin a plastic bottle after a single use"**

Kruskal-Wallis rank sum test

```
> kruskal.test(Item6.5 ~ FakConsumption2,
data=ura2013_EHU_en_NAgabe_corr)
```

Kruskal-Wallis rank sum test

data: Item6.5 by FakConsumption2

Kruskal-Wallis chi-squared = 36.5291, df = 3, p-value = 5.788e-08

p limit with Bonferroni correction =  $0.05/6$  (4 groups yields six combinations) =  $0.008$  or  $0.01/6 = 0.0016$

Multiple comparisons using kruskalmc in R

```
> kruskalmc(Item6.5 ~ FakConsumption2,
data=ura2013_EHU_en_NAgabe_corr)
Multiple comparison test after Kruskal-Wallis
p.value: 0.05
```

| Comparisons | obs.dif   | critical.dif | difference |
|-------------|-----------|--------------|------------|
| 1-2         | 87.67147  | 64.63178     | TRUE       |
| 1-3         | 181.44873 | 92.24337     | TRUE       |
| 1-4         | 133.68973 | 145.71845    | FALSE      |
| 2-3         | 93.77725  | 96.98944     | FALSE      |
| 2-4         | 46.01826  | 148.76821    | FALSE      |
| 3-4         | 47.75900  | 162.67622    | FALSE      |

Mean rank in 1 = a  
Mean rank in 2 = b  
Mean rank in 3 = b  
Mean rank in 4 = ab

**Table 2**

**Item 7.1: "Using glass or reusable bottles is safer than using plastic bottles"**

Kruskal-Wallis rank sum test

```
> kruskal.test(Item7.1 ~ FakConsumption2,  
data=ura2013_EHU_en_NAgabe_corr)
```

```
Kruskal-Wallis rank sum test  
data: Item7.1 by FakConsumption2
```

```
Kruskal-Wallis chi-squared = 6.496, df = 3, p-value = 0.08982
```

No significant differences

**Item 7.2: "By using a glass or reusable bottle, I motivate others to do the same"**

Kruskal-Wallis rank sum test

```
> kruskal.test(Item7.2 ~ FakConsumption2,  
data=ura2013_EHU_en_NAgabe_corr)
```

```
Kruskal-Wallis rank sum test  
data: Item7.2 by FakConsumption2
```

```
Kruskal-Wallis chi-squared = 6.6466, df = 3, p-value = 0.08406
```

No significant differences

**Item 7.3: "Carrying around a glass or reusable bottle is inconvenient"**

Kruskal-Wallis rank sum test

```
> kruskal.test(Item7.3 ~ FakConsumption2,  
data=ura2013_EHU_en_NAgabe_corr)
```

```
Kruskal-Wallis rank sum test  
data: Item7.3 by FakConsumption2
```

```
Kruskal-Wallis chi-squared = 29.7753, df = 3, p-value = 1.539e-06
```

```
p limit with Bonferroni correction = 0.05/6 (4 groups yields six  
combinations)= 0.008 or 0.01/6= 0.0016
```

## Multiple comparisons using kruskalmc in R

```
> kruskalmc(Item7.3 ~ FakConsumption2,  
data=ura2013_EHU_en_NAgabe_corr)  
Multiple comparison test after Kruskal-Wallis  
p.value: 0.05
```

| Comparisons | obs.dif    | critical.dif | difference |
|-------------|------------|--------------|------------|
| 1-2         | 95.610417  | 64.63178     | TRUE       |
| 1-3         | 93.110508  | 92.24337     | TRUE       |
| 1-4         | 212.379916 | 145.71845    | TRUE       |
| 2-3         | 2.499908   | 96.98944     | FALSE      |
| 2-4         | 116.769500 | 148.76821    | FALSE      |
| 3-4         | 119.269408 | 162.67622    | FALSE      |

```
> cld(.Pairs) # compact letter display
```

Mean rank in 1 = a

Mean rank in 2= b

Mean rank in 3 = b

Mean rank in 4 = b

**Table 3****Item 8.1: "Tap water is cheaper than bottled water"**Kruskal-Wallis rank sum test

```
> kruskal.test(Item8.1 ~ FakConsumption2,
data=ura2013_EHU_en_NAgabe_corr)
```

Kruskal-Wallis rank sum test

data: Item8.1 by FakConsumption2

Kruskal-Wallis chi-squared = 12.4876, df = 3, p-value = 0.005886

p limit with Bonferroni correction =  $0.05/6$  (4 groups yields six combinations) = 0.008 or  $0.01/6 = 0.0016$ ; **0.0058 < 0.008**

A pairwise comparison does not yield differences (kruskalmc)

**Item 8.2: "I trust tap water's quality"**Kruskal-Wallis rank sum test

```
> kruskal.test( RecodItem8.2 ~ FakConsumption2,
data=ura2013_EHU_en_NAgabe_corr)
```

Kruskal-Wallis rank sum test

data: RecodItem8.2 by FakConsumption2

Kruskal-Wallis chi-squared = 102.0997, df = 3, **p-value < 2.2e-16**

p limit with Bonferroni correction =  $0.05/6$  (4 groups yields six combinations) = 0.008 or  $0.01/6 = 0.0016$

Multiple comparisons using kruskalmc in R

```
> kruskalmc(RecodItem8.2 ~ FakConsumption2,
data=ura2013_EHU_en_NAgabe_corr)
Multiple comparison test after Kruskal-Wallis
p.value: 0.05
```

| Comparisons | obs.dif   | critical.dif | difference |
|-------------|-----------|--------------|------------|
| 1-2         | 103.52700 | 64.63178     | TRUE       |
| 1-3         | 282.00571 | 92.24337     | TRUE       |
| 1-4         | 309.22057 | 145.71845    | TRUE       |
| 2-3         | 178.47871 | 96.98944     | TRUE       |
| 2-4         | 205.69357 | 148.76821    | TRUE       |
| 3-4         | 27.21486  | 162.67622    | FALSE      |



Mean rank in 1 = a  
 Mean rank in 2 = b  
 Mean rank in 3 = c  
 Mean rank in 4 = c

**Item 8.3: "If I drink tap water I don't have to go to the cafeteria or the machine to purchase bottled water"**

Kruskal-Wallis rank sum test

```
> kruskal.test( Item8.3 ~ FakConsumption2,
data=ura2013_EHU_en_NAgabe_corr)
```

Kruskal-Wallis rank sum test

data: Item8.3 by FakConsumption2

Kruskal-Wallis chi-squared = 52.6997, df = 3, p-value = 2.125e-11

p limit with Bonferroni correction =  $0.05/6$  (4 groups yields six combinations) = 0.008 or  $0.01/6 = 0.0016$

Multiple comparisons using kruskalmc in R

```
> kruskalmc(Item8.3 ~ FakConsumption2,
data=ura2013_EHU_en_NAgabe_corr)
Multiple comparison test after Kruskal-Wallis
p.value: 0.05
```

| Comparisons | obs.dif   | critical.dif | difference |
|-------------|-----------|--------------|------------|
| 1-2         | 120.15879 | 64.63178     | TRUE       |
| 1-3         | 187.62064 | 92.24337     | TRUE       |
| 1-4         | 170.23672 | 145.71845    | TRUE       |
| 2-3         | 67.46186  | 96.98944     | FALSE      |
| 2-4         | 50.07793  | 148.76821    | FALSE      |
| 3-4         | 17.38393  | 162.67622    | FALSE      |

Mean rank in 1 = a  
 Mean rank in 2 = b  
 Mean rank in 3 = b  
 Mean rank in 4 = b

**Item 8.4: "If I drink tap water I am contributing less plastic to landfills"**

Kruskal-Wallis rank sum test

```
> kruskal.test(Item8.4 ~ FakConsumption2,
data=ura2013_EHU_en_Nagabe_corr)
```

Kruskal-Wallis rank sum test

data: Item8.4 by FakConsumption2

Kruskal-Wallis chi-squared = 50.5408, df = 3, p-value = 6.128e-11

p limit with Bonferroni correction =  $0.05/6$  (4 groups yields six combinations) = 0.008 or  $0.01/6 = 0.0016$

#### Multiple comparisons using kruskalmc in R

```
> kruskalmc(Item8.4 ~ FakConsumption2,
data=ura2013_EHU_en_NAgabe_corr)
Multiple comparison test after Kruskal-Wallis
p.value: 0.05
```

| Comparisons | obs.dif   | critical.dif | difference |
|-------------|-----------|--------------|------------|
| 1-2         | 71.60654  | 64.63178     | TRUE       |
| 1-3         | 178.09119 | 92.24337     | TRUE       |
| 1-4         | 203.39922 | 145.71845    | TRUE       |
| 2-3         | 106.48464 | 96.98944     | TRUE       |
| 2-4         | 131.79268 | 148.76821    | FALSE      |
| 3-4         | 25.30804  | 162.67622    | FALSE      |

Mean rank in 1 = a  
Mean rank in 2 = b  
Mean rank in 3 = c  
Mean rank in 4 = bc

#### **Item 8.5: "If I drink tap water I can reduce my consumption of oil to make plastics"**

#### Kruskal-Wallis rank sum test

```
> kruskal.test(Item8.5 ~ FakConsumption2,
data=ura2013_EHU_en_Nagabe_corr)
```

Kruskal-Wallis rank sum test

data: Item8.5 by FakConsumption2  
Kruskal-Wallis chi-squared = 59.5124, df = 3, p-value = 7.472e-13

p limit with Bonferroni correction =  $0.05/6$  (4 groups yields six combinations) = 0.008 or  $0.01/6 = 0.0016$

#### Multiple comparisons using kruskalmc in R

```
> kruskalmc(Item8.5 ~ FakConsumption2,
data=ura2013_EHU_en_NAgabe_corr)
Multiple comparison test after Kruskal-Wallis
p.value: 0.05
```

| Comparisons | obs.dif   | critical.dif | difference |
|-------------|-----------|--------------|------------|
| 1-2         | 57.82034  | 64.63178     | FALSE      |
| 1-3         | 218.19493 | 92.24337     | TRUE       |

|     |           |           |       |
|-----|-----------|-----------|-------|
| 1-4 | 176.05841 | 145.71845 | TRUE  |
| 2-3 | 160.37459 | 96.98944  | TRUE  |
| 2-4 | 118.23807 | 148.76821 | FALSE |
| 3-4 | 42.13652  | 162.67622 | FALSE |

Mean rank in 1 = a  
Mean rank in 2 = a  
Mean rank in 3 = b  
Mean rank in 4 = ab

**Item 8.6: "If I drink tap water, I am reducing my personal contribution to global climate change"**

Kruskal-Wallis rank sum test

```
> kruskal.test(Item8.6 ~ FakConsumption2,
data=ura2013_EHU_en_Nagabe_corr)
```

Kruskal-Wallis rank sum test

data: Item8.6 by FakConsumption2  
Kruskal-Wallis chi-squared = 31.9206, df = 3, p-value = 5.439e-07

p limit with Bonferroni correction = 0.05/6 (4 groups yields six combinations)= 0.008 or 0.01/6= 0.0016

Multiple comparisons using kruskalmc in R

```
> kruskalmc(Item8.6 ~ FakConsumption2,
data=ura2013_EHU_en_NAgabe_corr)
Multiple comparison test after Kruskal-Wallis
p.value: 0.05
```

| Comparisons | obs.dif    | critical.dif | difference |
|-------------|------------|--------------|------------|
| 1-2         | 58.751549  | 64.63178     | FALSE      |
| 1-3         | 159.236046 | 92.24337     | TRUE       |
| 1-4         | 165.161663 | 145.71845    | TRUE       |
| 2-3         | 100.484497 | 96.98944     | TRUE       |
| 2-4         | 106.410115 | 148.76821    | FALSE      |
| 3-4         | 5.925617   | 162.67622    | FALSE      |

Mean rank in 1 = a  
Mean rank in 2 = ab  
Mean rank in 3 = c  
Mean rank in 4 = bc

**Item 8.7. If I drink tap water, I am helping to make our campus more sustainable**

Kruskal-Wallis rank sum test

```
> kruskal.test(Item8.7 ~ FakConsumption2,
data=ura2013_EHU_en_NAgabe_corr)
```

Kruskal-Wallis rank sum test

data: Item8.7 by FakConsumption2

Kruskal-Wallis chi-squared = 35.5836, df = 3, p-value = 9.171e-08

p limit with Bonferroni correction =  $0.05/6$  (4 groups yields six combinations)= 0.008 or  $0.01/6= 0.0016$

```
> kruskalmc(Item8.7 ~ FakConsumption2,
data=ura2013_EHU_en_NAgabe_corr)
```

Multiple comparison test after Kruskal-Wallis  
p.value: 0.05

| Comparisons | obs.dif   | critical.dif | difference |
|-------------|-----------|--------------|------------|
| 1-2         | 64.37119  | 64.63178     | FALSE      |
| 1-3         | 154.38270 | 92.24337     | TRUE       |
| 1-4         | 203.28411 | 145.71845    | TRUE       |
| 2-3         | 90.01151  | 96.98944     | FALSE      |
| 2-4         | 138.91292 | 148.76821    | FALSE      |
| 3-4         | 48.90140  | 162.67622    | FALSE      |

Mean rank in 1 = a

Mean rank in 2 = abc

Mean rank in 3 = bc

Mean rank in 4 = c

```
> cld(.Pairs) # compact letter display
```

```
  2    3    4    1
"ab" "bc" "c" "a"
```

**Item 8.8: "When I go to the campus restaurant, I can get tap water"**

Kruskal-Wallis rank sum test

```
> kruskal.test(Item8.8 ~ FakConsumption2,
data=ura2013_EHU_en_NAgabe_corr)
```

Kruskal-Wallis rank sum test

data: Item8.8 by FakConsumption2

Kruskal-Wallis chi-squared = 3.89, df = 3, p-value = 0.2736
